# Supplementary material for: Effects of Aloe arborescens Whole Plant Homogenate on Lipid Metabolism, Inflammatory Conditions and Liver Function of Dairy Cows during the Transition Period
Source: PubMed Central journal article supplement (PMC7278487; doi:10.3390/ani10050917), 2020-05-25
Supplement: animals-10-00917-s001.pdf [file animals-10-00917-s001.pdf]

**Supplementary Materials:**

**Supplementary file 1.** Intra- and inter-assay coefficient of variations, limit of quantification (LOQ), codes of commercial kits used and references for their validation in the bovine plasma for plasma parameters included in the study.

| <b>Parameter</b> | <b>Inter</b> | <b>Intra</b> | <b>LOQ</b> | <b>Commercial kit</b>                                                   | <b>Reference</b>                |
|------------------|--------------|--------------|------------|-------------------------------------------------------------------------|---------------------------------|
| Glucose          | 0.75         | 1.33         | 0.10       | 0018250840; Instrumentation<br>Laboratory Werfen, Milano, Italy         |                                 |
| Cholesterol      | 1.38         | 1.56         | 0.10       | 0018250540; Instrumentation<br>Laboratory Werfen, Milano, Italy         |                                 |
| Urea             | 1.23         | 1.14         | 0.01       | 0018255440; Instrumentation<br>Laboratory Werfen, Milano, Italy         |                                 |
| Calcium          | 1.86         | 0.93         | 0.20       | 0018250340; Instrumentation<br>Laboratory Werfen, Milano, Italy         |                                 |
| Zinc             | 3.83         | 1.76         | 0.500      | 439-14906; Wako Chemicals GmbH,<br>Neuss, Germany                       |                                 |
| Ceruloplasmin    | 3.57         | 1.39         | 0.100      | -                                                                       | (Sunderman and<br>Nomoto, 1970) |
| Total proteins   | 2.87         | 1.07         | 10.00      | 0018251440; Instrumentation<br>Laboratory Werfen, Milano, Italy         |                                 |
| Albumins         | 3.41         | 1.20         | 16.00      | 0018250040; Instrumentation<br>Laboratory Werfen, Milano, Italy         |                                 |
| AST/GOT          | 3.55         | 1.78         | 1.00       | 0018257540; Instrumentation<br>Laboratory Werfen, Milano, Italy         |                                 |
| GGT              | 4.42         | 2.27         | 2.00       | 0018257640; Instrumentation<br>Laboratory Werfen, Milano, Italy         |                                 |
| Bilirubin        | 2.46         | 3.11         | 2.00       | 0018254640; Instrumentation<br>Laboratory Werfen, Milano, Italy         |                                 |
| Haptoglobin      | 3.50         | 3.64         | 0.01       | -                                                                       | (Skinner et al.,<br>1991)       |
| NEFA             | 5.00         | 2.27         | 0.010      | 434-91795 NEFA-HR (2) R1 Set;<br>Wako Chemicals GmbH, Neuss,<br>Germany |                                 |
| BHB              | 3.42         | 0.82         | 0.100      | RB1007; Randox Laboratories Ltd.,<br>Crumlin, Co. Antrim, UK            |                                 |
| Creatinine       | 3.09         | 1.09         | 18.00      | 0018255540; Instrumentation<br>Laboratory Werfen, Milano, Italy         |                                 |
| ROMt             | 2.93         | 1.40         | 3.20       | MC003; Diacron srl, Grosseto, Italy                                     |                                 |
| Paraoxonase      | 4.60         | 1.38         | 1.20       | -                                                                       | (Ferré et al., 2002)            |

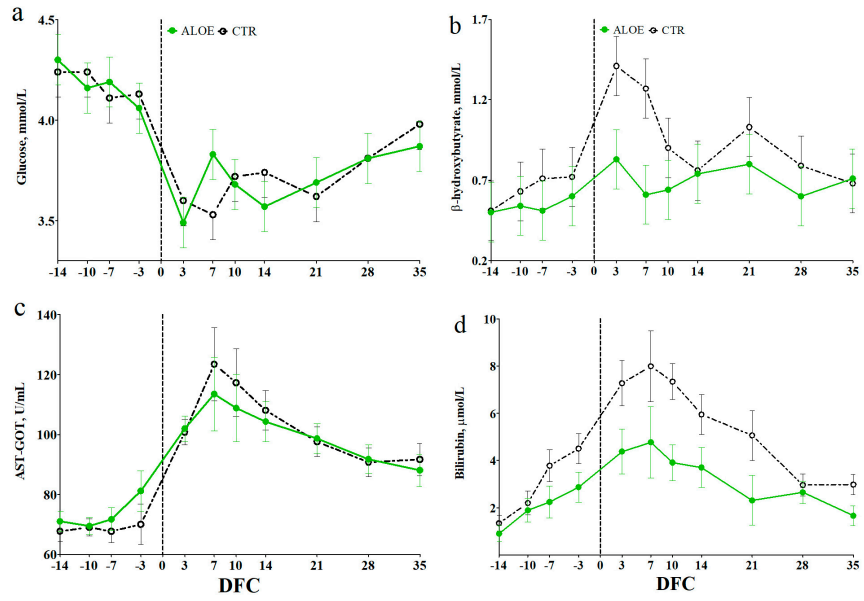

**Supplementary File 2.** Pattern of plasmatic concentrations of glucose (a), beta hydroxybutyrate (b), glutamate-oxaloacetate transaminase (AST-GOT; c) and bilirubin (d) expressed as their original values in dairy cows receiving placebo water (CTR; black dotted line) or cows receiving a drench of 200 g/d of *Aloe arborescens* Mill. whole plant homogenate between -14 and 14 days from calving (AAM; green solid line). DFC is days from calving.

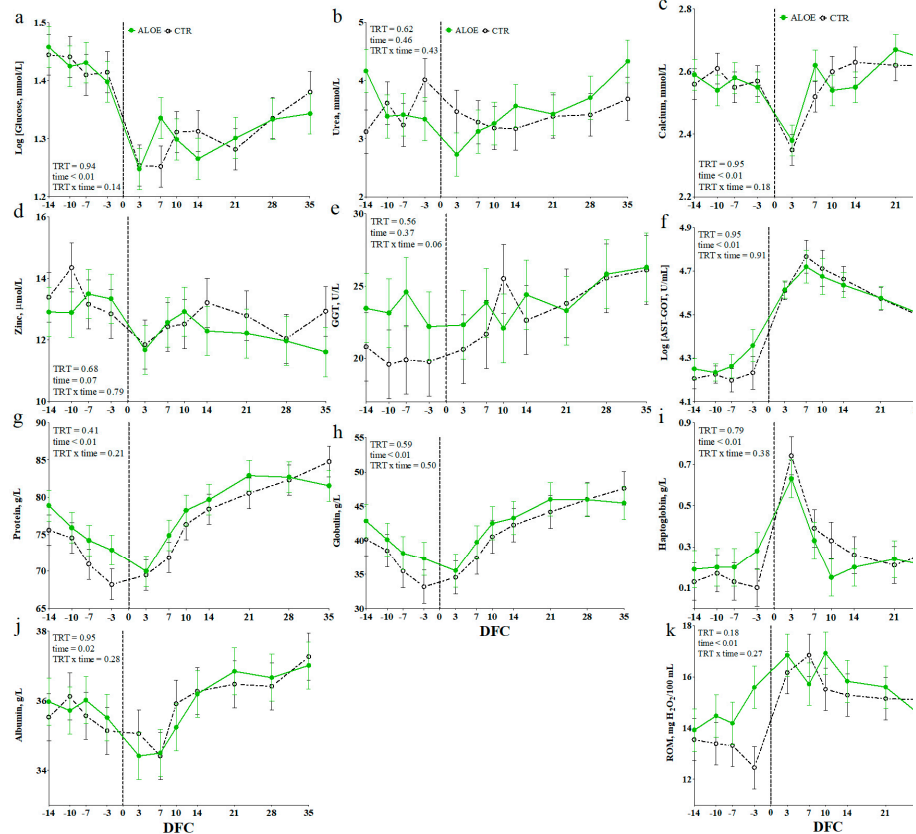

**Supplementary File 3.** Pattern of plasmatic concentrations of glucose (a), urea (b), calcium (c), zinc (d), gamma-glutamyl transferase (GGT; e), glutamate-oxaloacetate transaminase (AST-GOT; f), protein (g), globulin (h), haptoglobin (i), albumin (j) and reactive oxygen metabolites (ROM; k) in dairy cows receiving placebo water (CTR; black dotted line) or cows receiving a drench of 200 g/d of *Aloe arborescens Mill.* whole plant homogenate between -14 and 14 days from calving (AAM; green solid line). Log indicates data expressed as log-transformed; DFC is days from calving.
